# Supplementary material for: Modulation of bactericidal action in polymer nanocomposites: light-tuned Ag+ release from electrospun PMMA fibers
Source: Royal Society of Chemistry journal article supplement (doi:10.1039/c6ra16876k), 2016-01-01

## SUPPORTING INFORMATION

### Modulation of Bactericidal Action in Polymer Nanocomposites: Light-Tuned Ag<sup>+</sup> Release From Electrospun PMMA Fibers

I. Moreno,<sup>a</sup> N. Navascues,<sup>a</sup> S. Irusta<sup>a,b, †</sup> and J. Santamaria<sup>a,b, †</sup>

<sup>a</sup> Dept. Chemical Engineering, Nanoscience Institute of Aragon (INA), University of Zaragoza, 50018, Spain

<sup>b</sup> Networking Research Center of Bioengineering, Biomaterials and nanomedicine (CIBER-BBN). Maria de Luna 11. 50018. Zaragoza, Spain

Figure 1SI: XRD pattern of 40Ag fiber under different irradiation times.

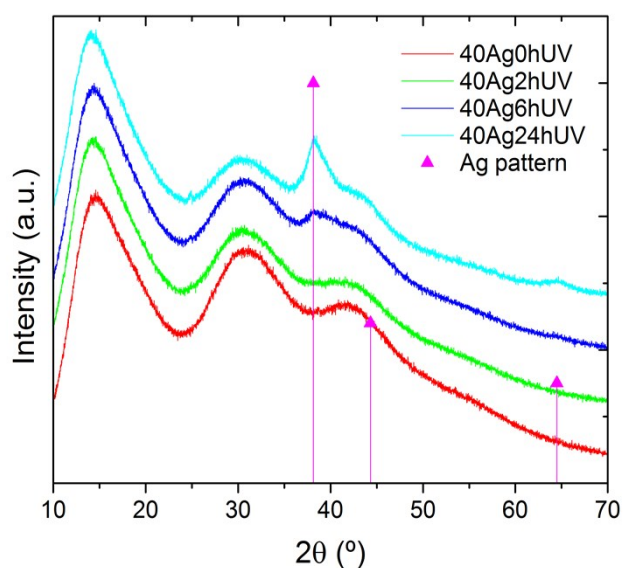

Figure 2SI: XPS survey spectra of non-irradiated samples

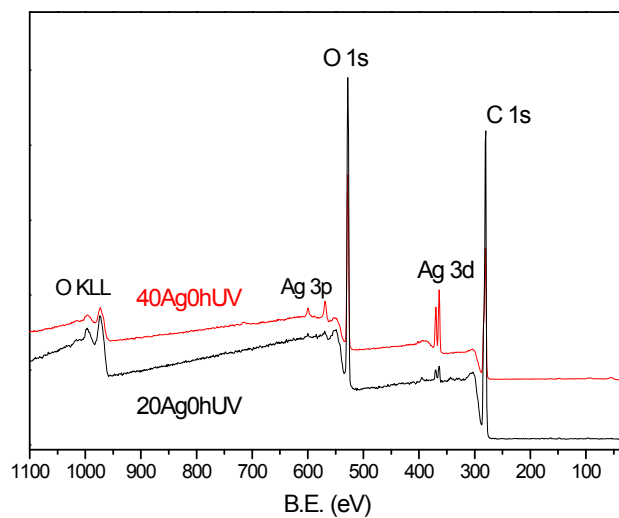

Figure 3 SI: TGA analysis of as spun fibers and fibers irradiated during 24 hs.

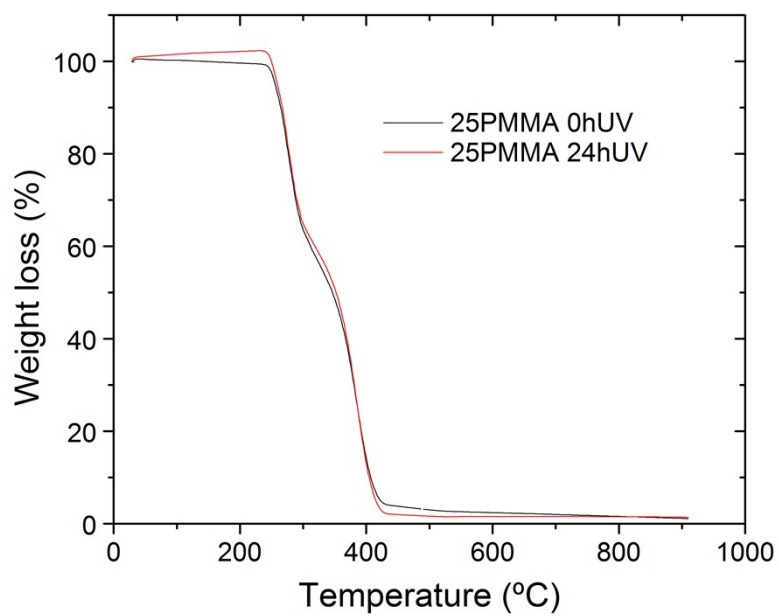

Supplement: c6ra16876k1.pdf [file c6ra16876k1.pdf]
